# Supplementary material for: A Rotational Slurry Bioreactor Accelerates Biodegradation of A-Fuel in Oil-Contaminated Soil Even under Low Temperature Conditions
Source: MDPI journal article supplement (doi:10.3390/microorganisms8020291), 2020-02-20
Supplement: s1 [file s1]

A: #3, 4

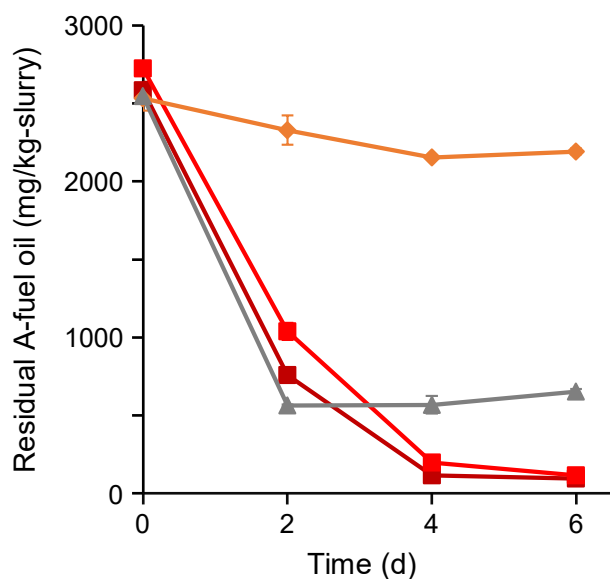

B: #3, 4

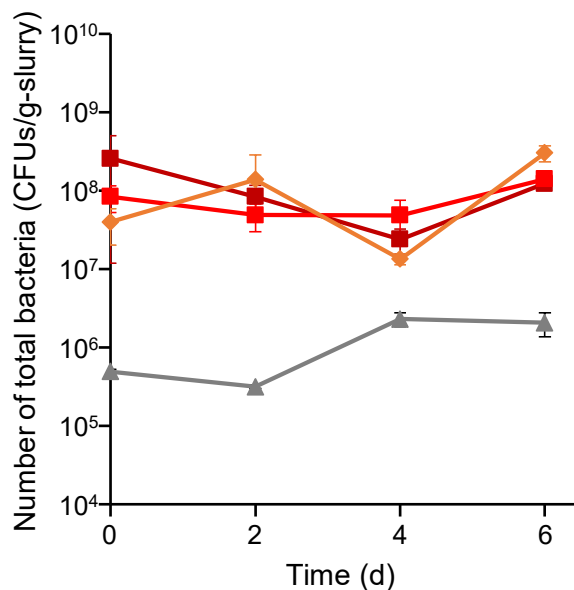

C: #5, 6

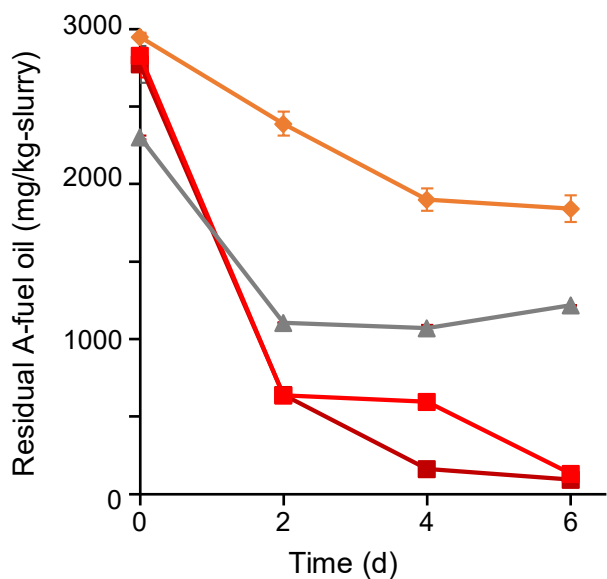

D: #5, 6

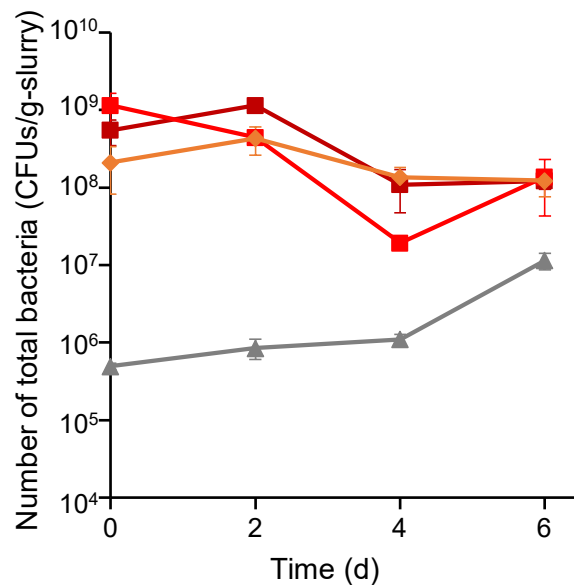

▲ Non-inoculated (12 rpm)

◆ Inoculated with A and C (0 rpm)

■ Inoculated with A and C (12 rpm) #3,5

■ Inoculated with A and C (12 rpm) #4,6

**Figure S1.** Biodegradation of 2500 mg/kg-slurry of A-fuel oil in rotational slurry bioreactors (results of another lots, #3,4,5,6). Panels A and C showed changes in the residual A-fuel oil in 6 days. Panels B and D showed changes in the numbers of total bacteria and A-fuel oil degraders (CFU/g-slurry) in 6 days. Two independent assays were performed for the samples inoculated with degraders (strains A and C) at 12 rpm rotation. Standard deviations of triplicate data are shown.

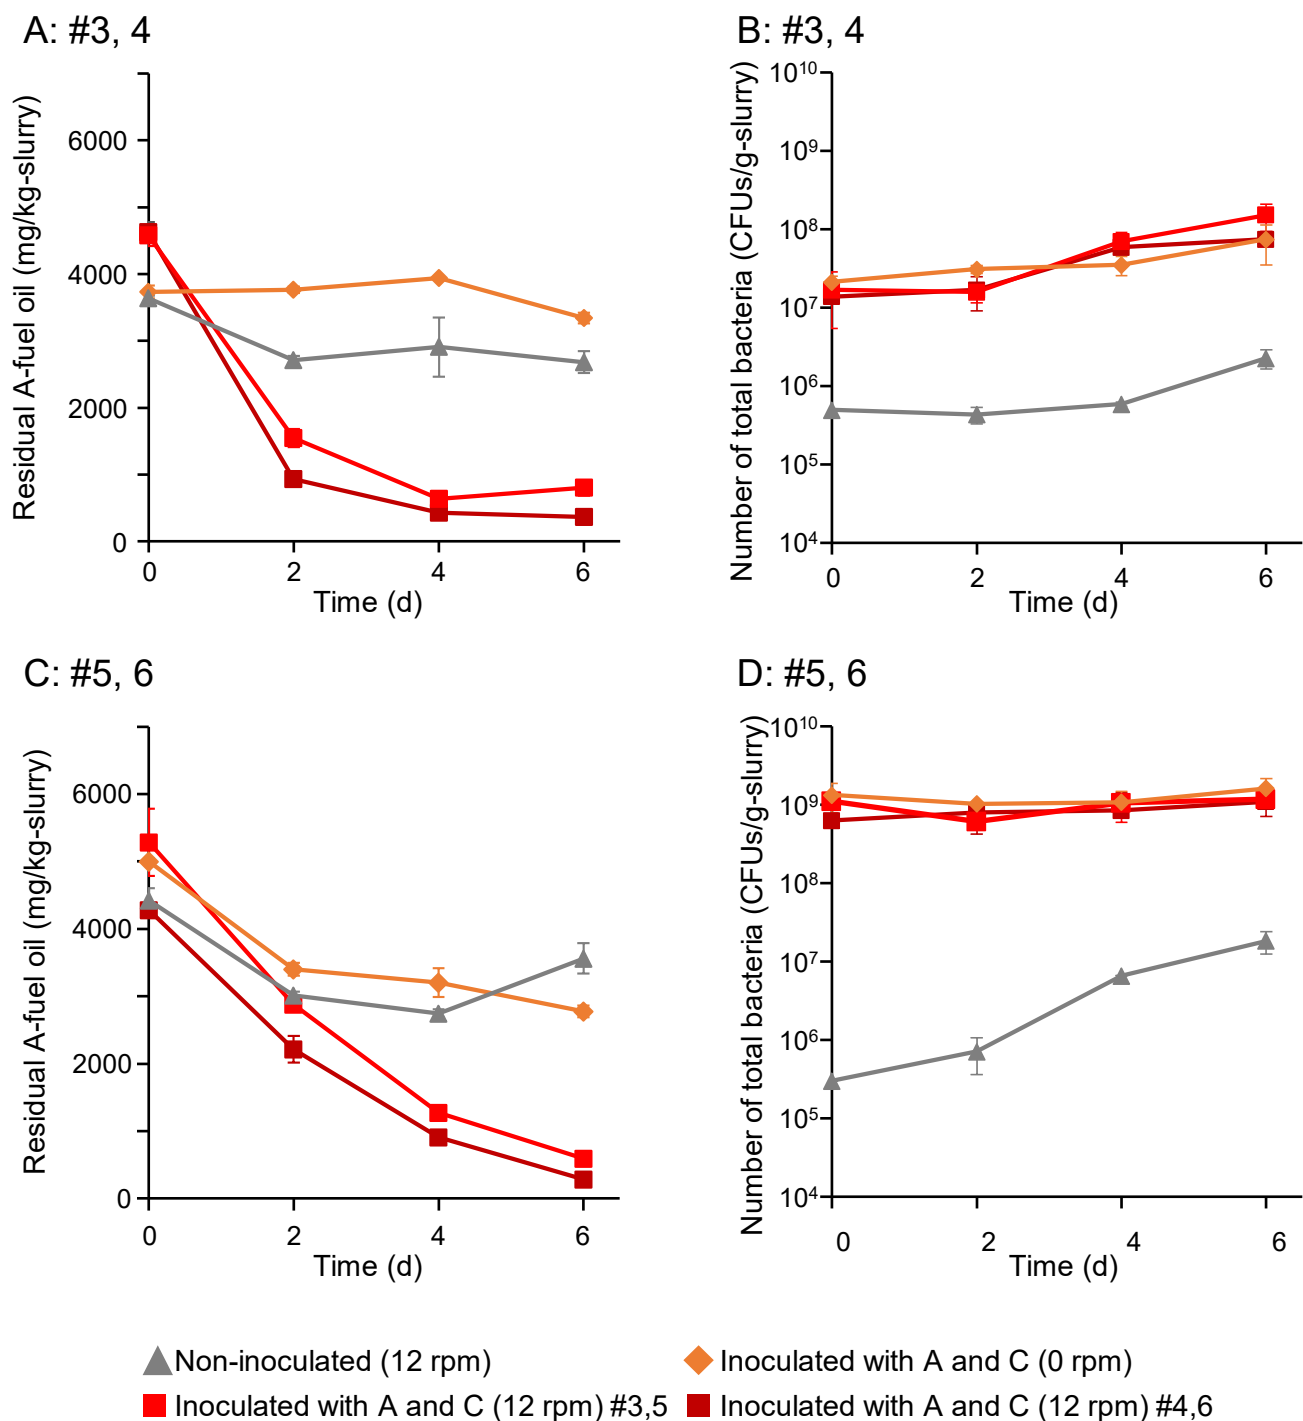

**Figure S2.** Biodegradation of 5000 mg/kg-slurry of A-fuel oil in rotational slurry bioreactors (results of another lots, #3,4,5,6). Panels A and C showed changes in the residual A-fuel oil in 6 days. Panels B and D showed changes in the numbers of total bacteria and A-fuel oil degraders (CFU/g-slurry) in 6 days. Two independent assays were performed for the samples inoculated with degraders (strains A and C) at 12 rpm rotation. Standard deviations of triplicate data are shown.
